# Supplementary material
Source: PubMed Central journal article supplement (PMC2639505)

Supplementary Table 1

**Supplementary Table 1:** Values for real-time PCR and pyrosequencing

|                                 | <b>BC-12.5</b>                 | <b>BC-15.5</b>                 | <b>BC-P0</b>                   |
|---------------------------------|--------------------------------|--------------------------------|--------------------------------|
| <b>RE</b>                       | $10.9 \pm 0.9 \times 10^{-3}$  | $65.5 \pm 1.0 \times 10^{-3}$  | $1.15 \pm 0.09$                |
| <b>% CAST allele</b>            | $66.2 \pm 1.9$                 | $45.3 \pm 1.0$                 | $30.7 \pm 1.2$                 |
| <b>CAST RE</b>                  | $7.23 \pm 0.60 \times 10^{-3}$ | $29.7 \pm 0.8 \times 10^{-3}$  | $35.4 \pm 3.1 \times 10^{-2}$  |
| <b>Fold increase in CAST RE</b> |                                | 4.1                            | 11.9                           |
| <b>BL6 RE</b>                   | $3.70 \pm 0.60 \times 10^{-3}$ | $35.8 \pm 0.8 \times 10^{-3}$  | $79.9 \pm 3.1 \times 10^{-2}$  |
| <b>Fold increase in BL6 RE</b>  |                                | 9.7                            | 22.3                           |
|                                 | <b>CB-12.5</b>                 | <b>CB-15.5</b>                 | <b>CB-P0</b>                   |
| <b>RE</b>                       | $9.79 \pm 2.05 \times 10^{-3}$ | $7.91 \pm 1.03 \times 10^{-2}$ | $1.16 \pm 0.09$                |
| <b>% CAST allele</b>            | $76.6 \pm 2.8$                 | $67.6 \pm 1.0$                 | $31.7 \pm 0.4$                 |
| <b>CAST RE</b>                  | $7.50 \pm 1.59 \times 10^{-3}$ | $53.5 \pm 7.0 \times 10^{-3}$  | $36.9 \pm 3.2 \times 10^{-2}$  |
| <b>Fold increase in CAST RE</b> |                                | 7.1                            | 6.9                            |
| <b>BL6 RE</b>                   | $2.29 \pm 1.59 \times 10^{-3}$ | $25.6 \pm 7.0 \times 10^{-3}$  | $79.5 \pm 3.2 \times 10^{-2}$  |
| <b>Fold increase in BL6 RE</b>  |                                | 11.2                           | 31.0                           |
|                                 | <b>BJ-12.5</b>                 | <b>BJ-15.5</b>                 | <b>BJ-P0</b>                   |
| <b>RE</b>                       | $51.7 \pm 3.4 \times 10^{-3}$  | $67.0 \pm 2.1 \times 10^{-2}$  | $22.2 \pm 3.0 \times 10^{-1}$  |
| <b>% JF1 allele</b>             | $91.4 \pm 1.2$                 | $85.8 \pm 1.1$                 | $60.0 \pm 0.8$                 |
| <b>JF1 RE</b>                   | $47.3 \pm 3.2 \times 10^{-3}$  | $57.5 \pm 1.9 \times 10^{-2}$  | $13.3 \pm 1.8 \times 10^{-1}$  |
| <b>Fold increase in JF1 RE</b>  |                                | 12.2                           | 2.3                            |
| <b>BL6 RE</b>                   | $4.43 \pm 3.15 \times 10^{-3}$ | $9.54 \pm 1.93 \times 10^{-2}$ | $8.89 \pm 1.80 \times 10^{-1}$ |
| <b>Fold increase in BL6 RE</b>  |                                | 21.5                           | 9.3                            |
|                                 | <b>JB-12.5</b>                 | <b>JB-15.5</b>                 | <b>JB-P0</b>                   |
| <b>RE</b>                       | $16.0 \pm 0.2 \times 10^{-2}$  | $33.1 \pm 1.4 \times 10^{-2}$  | $14.1 \pm 0.6 \times 10^{-1}$  |
| <b>% JF1 allele</b>             | $94.1 \pm 1.6$                 | $94.1 \pm 1.1$                 | $61.7 \pm 1.5$                 |
| <b>JF1 RE</b>                   | $15.1 \pm 0.3 \times 10^{-2}$  | $31.1 \pm 1.38 \times 10^{-2}$ | $86.8 \pm 4.3 \times 10^{-2}$  |
| <b>Fold increase in JF1 RE</b>  |                                | 2.1                            | 2.8                            |
| <b>BL6 RE</b>                   | $9.54 \pm 3.04 \times 10^{-3}$ | $1.95 \pm 1.38 \times 10^{-2}$ | $54.0 \pm 4.3 \times 10^{-2}$  |
| <b>Fold increase in BL6 RE</b>  |                                | 2.0                            | 27.7                           |

RE: relative expression (*Pon1* expression normalized by *beta-2-microglobulin*)

All measurements were performed in triplicates

Supplementary Figure 1

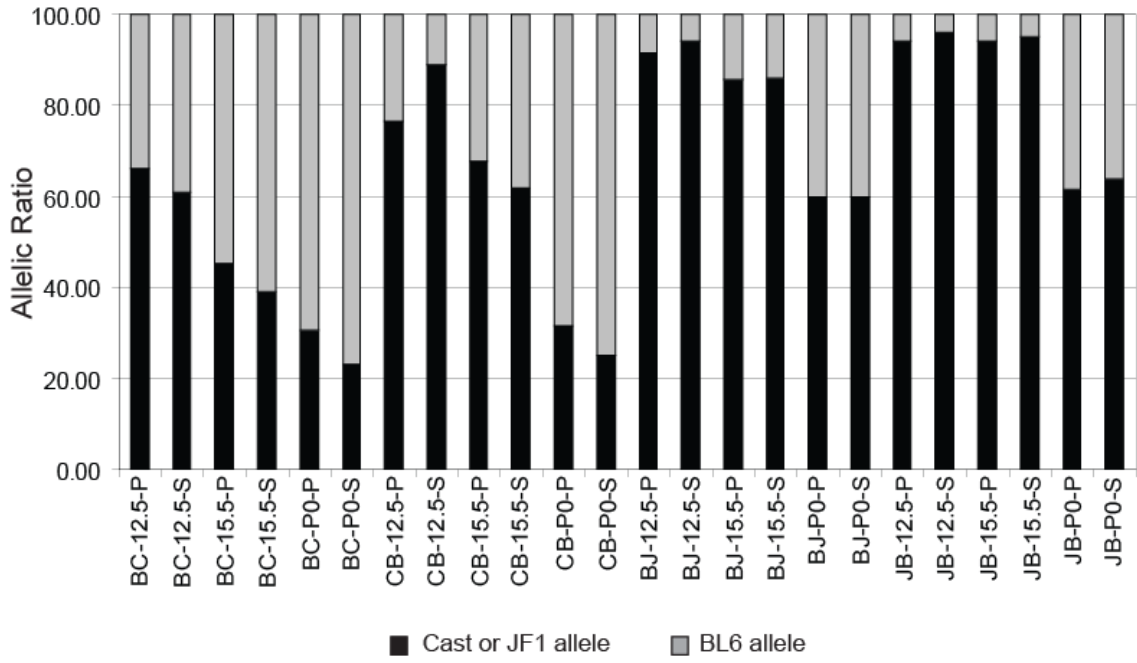

Supplement: ddn222_1.pdf [file ddn222_1.pdf]
